# Supplementary material
Source: publisher figshare collection journal article supplement (https://acs.figshare.com/ndownloader/files/4770847)
Supplement: Supplementary file 1 [file 4770847]

Submitted to *J. Am. Chem. Soc.*  
Version of July 7, 2006

## Supporting Information

### **The Dark Side of Crystal Engineering: Creating Glasses from Small Symmetric Molecules that Form Multiple Hydrogen Bonds**

Olivier Lebel, Thierry Maris, Marie-Ève Perron, Eric Demers, and James D. Wuest\*

*Département de Chimie, Université de Montréal  
Montréal, Québec H3C 3J7 Canada*

#### **Contents**

- I. Experimental Section (S2-S8)**
- II. Modulated Differential Scanning Calorimetry Thermograms of Crystalline and Amorphous Methyl 4,6-Bis(dimexylamino)-1,3,5-triazine-2-carboxylate (2a) (S9-S12)**
- III. Structure of Crystals of Methyl 4,6-Bis(dimexylamino)-1,3,5-triazine-2-carboxylate (2a) Grown from CHCl<sub>3</sub> (S13-S19)**
- IV. FT-IR Spectra of Methyl 4,6-Bis(dimexylamino)-1,3,5-triazine-2-carboxylate (2a) in the Crystalline State, in the Amorphous State, and in Solution in CH<sub>2</sub>Cl<sub>2</sub> (S20-S21)**

\*Author to whom correspondence may be addressed: james.d.wuest@umontreal.ca

## Experimental Section

1,5-Dimethylbiguanide (**1**),<sup>1</sup> methyl 4,6-bis(dimethylamino)-1,3,5-triazine-2-carboxylate (**2a**),<sup>2</sup> methyl 4,6-bis(phenylamino)-1,3,5-triazine-2-carboxylate (**3a**),<sup>2</sup> methyl 4,6-bis[(4-methylphenyl)amino]-1,3,5-triazine-2-carboxylate (**3b**),<sup>2</sup> methyl 4,6-bis[(3-methylphenyl)amino]-1,3,5-triazine-2-carboxylate (**3c**),<sup>2</sup> methyl 4,6-bis[(2-methylphenyl)amino]-1,3,5-triazine-2-carboxylate (**3d**),<sup>2</sup> and 4,6-dichloro-2-methylamino-1,3,5-triazine<sup>3</sup> were prepared according to published procedures. New compounds **2b-f** and **4a-c** were prepared by the routes summarized in Schemes 1-3 and described in detail below.

**Scheme 1**

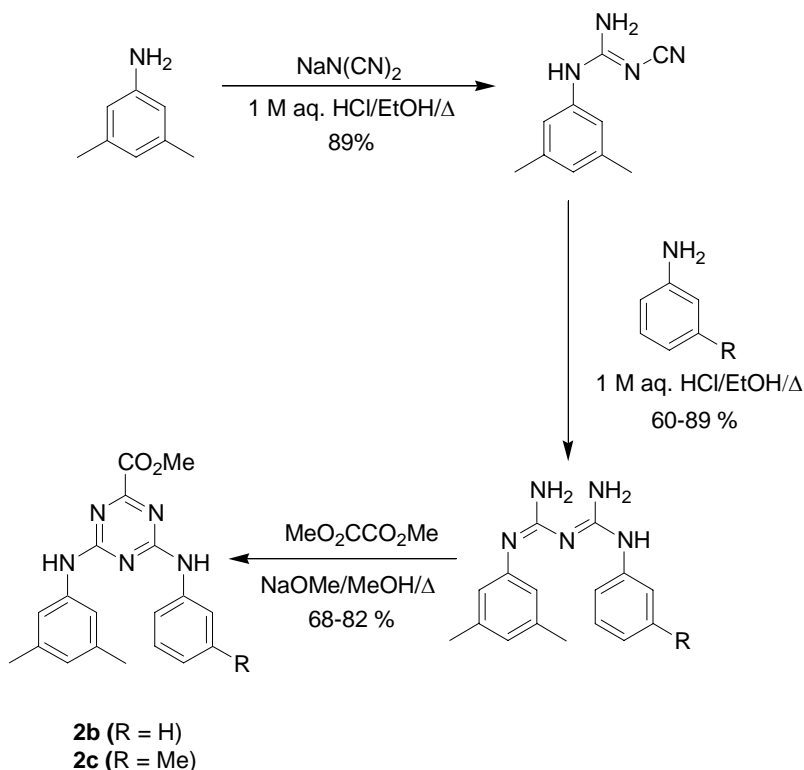

### Methyl 4-(mexylamino)-6-phenylamino-1,3,5-triazine-2-carboxylate (**2b**)

3,5-Dimethylaniline (6.23 mL, 6.06 g, 50.0 mmol) was added to aqueous HCl (50.0 mL, 1.00 M, 50.0 mmol) in a round-bottom flask equipped with a magnetic stirrer. The mixture was stirred for 15 min at room temperature, then sodium dicyanamide (4.45 g, 50.0 mmol) was added, and the mixture was heated at reflux for 2 h. The resulting mixture was cooled to room temperature, AcOEt was added, and the two phases were separated. The organic phase was recovered, dried over  $\text{MgSO}_4$ , and filtered, and volatiles were removed by evaporation under reduced pressure. The crude product was triturated with hot hexane to yield mexyldicyandiamide (8.35 g, 44.4 mmol, 89%): mp 128 °C; IR (KBr) 3392, 3322, 3215, 3015, 2953, 2919, 2732, 2504, 2439, 2173, 1658, 1602, 1552, 1467, 1382, 1328, 1300, 1269, 1238, 1178, 1102, 1037, 891, 881, 839, 709, 682, 589, 534  $\text{cm}^{-1}$ ;  $^1\text{H}$  NMR (400 MHz,  $\text{CDCl}_3$ )  $\delta$  7.92 (s, 1H), 6.88 (s, 1H), 6.87 (s, 2H), 5.91 (s, 2H), 2.29 (s, 6H);  $^{13}\text{C}$  NMR (100 MHz,  $\text{CDCl}_3$ )  $\delta$  160.7, 140.0, 135.6, 129.0, 122.2, 118.4, 21.4; HRMS (ESI) calcd for

$\text{C}_{10}\text{H}_{13}\text{N}_4$  *m/e* 189.1135, found 189.1143. Anal. Calcd for  $\text{C}_{10}\text{H}_{13}\text{N}_4$ : C, 63.81; H, 6.43; N, 29.77. Found: C, 63.75; H, 6.65; N, 29.36.

A mixture of aniline (0.243 mL, 0.248 g, 2.66 mmol), aqueous HCl (2.66 mL, 1.00 M, 2.66 mmol), and EtOH (10 mL) was stirred at room temperature for 15 min, then mexyldicyandiamide (0.500 g, 2.66 mmol) was added and the mixture was heated at reflux overnight. Volatiles were removed by evaporation *in vacuo*, then the crude product was recrystallized from hot water and washed with  $\text{CH}_2\text{Cl}_2$  to give 1-mexyl-5-phenylbiguanide hydrochloride (0.755 g, 2.38 mmol, 89%): mp 210 °C; IR (KBr) 3428, 3308, 3178, 3120, 2994, 2945, 2912, 2605, 1635, 1615, 1602, 1582, 1523, 1494, 1447, 1377, 1300, 1249, 1178, 1088, 1036, 901, 871, 849, 759, 741, 718, 684, 627, 555, 521, 501, 473  $\text{cm}^{-1}$ ;  $^1\text{H}$  NMR (400 MHz,  $\text{DMSO}-d_6$ )  $\delta$  9.69 (s, 1H), 9.66 (s, 1H), 7.42 (s, 2H), 7.32 (m, 6H), 7.10 (m, 1H), 6.88 (s, 2H), 6.75 (s, 1H), 2.20 (s, 6H);  $^{13}\text{C}$  NMR (100 MHz,  $\text{DMSO}-d_6$ )  $\delta$  157.3, 156.6, 138.2, 138.1, 137.6, 129.0, 126.3, 124.5, 122.0, 119.9, 21.1; HRMS (ESI) calcd for  $\text{C}_{16}\text{H}_{20}\text{N}_5$  *m/e* 282.1713, found 282.1709. Anal. Calcd for  $\text{C}_{16}\text{H}_{20}\text{ClN}_5$ : C, 60.47; H, 6.34; N, 22.04. Found: C, 60.06; H, 6.35; N, 21.97.

Methanolic NaOMe (25%, 0.440 mL, 1.92 mmol) was added to a mixture of 1-mexyl-5-phenylbiguanide hydrochloride (0.466 g, 1.47 mmol) in MeOH (30 mL), and the resulting mixture was stirred for 15 min at room temperature. Dimethyl oxalate (0.521 g, 4.41 mmol) was added and the mixture was heated at reflux overnight. The mixture was then cooled to room temperature,  $\text{H}_2\text{O}$  and AcOEt were added, and the two phases were separated. The organic phase was recovered and dried over  $\text{MgSO}_4$ , and volatiles were removed by evaporation under reduced pressure. The crude product was then passed through a short pad of silica using 1:1 AcOEt/hexane as eluent. Evaporation of the solvent then yielded methyl 4-(mexylamino)-6-phenylamino-1,3,5-triazine-2-carboxylate (**2b**; 0.421 g, 1.20 mmol, 82%):  $T_g$  51 °C; IR (KBr) 3267, 3186, 3104, 3012, 2949, 2918, 2851, 1749, 1703, 1604, 1577, 1521, 1442, 1350, 1297, 1263, 1217, 1169, 1100, 1042, 1005, 976, 911, 842, 826, 788, 754, 687, 647, 619, 541, 504  $\text{cm}^{-1}$ ;  $^1\text{H}$  NMR (400 MHz,  $\text{CDCl}_3$ )  $\delta$  7.60 (d,  $^3J = 7.6$  Hz, 2H), 7.54 (bs, 1H), 7.47 (bs, 1H), 7.36 (t,  $^3J = 7.6$  Hz, 2H), 7.19 (s, 2H), 7.15 (t,  $^3J = 7.6$  Hz, 1H), 6.80 (s, 1H), 4.02 (s, 3H), 2.31 (s, 6H);  $^{13}\text{C}$  NMR (100 MHz,  $\text{CDCl}_3$ )  $\delta$  164.6, 164.5, 163.5, 163.3, 138.6, 137.4, 137.1, 128.9, 126.1, 124.3, 121.2, 118.6, 53.4, 21.3; HRMS (ESI) calcd for  $\text{C}_{19}\text{H}_{20}\text{N}_5\text{O}_2$  *m/e* 350.1612, found 350.1614. Anal. Calcd for  $\text{C}_{19}\text{H}_{19}\text{N}_5\text{O}_2$ : C, 65.32; H, 5.48; N, 20.04. Found: C, 64.96; H, 5.51; N, 19.92.

### Methyl 4-(mexylamino)-6-[(3-methylphenyl)amino]-1,3,5-triazine-2-carboxylate (**2c**)

1-Mexyl-5-(3-methylphenyl)biguanide hydrochloride was prepared by a method analogous to the one used to make 1-mexyl-5-phenylbiguanide hydrochloride. The reaction of 3-methylaniline (0.569 mL, 0.569 g, 5.31 mmol) with mexyldicyandiamide (1.00 g, 5.31 mmol) yielded 1-mexyl-5-(3-methylphenyl)biguanide hydrochloride (1.06 g, 3.19 mmol, 60%): mp 212 °C; IR (KBr) 3308, 3189, 3131, 3005, 2917, 1633, 1602, 1519, 1489, 1454, 1376, 1319, 1260, 1182, 1092, 842, 775, 719, 682, 501  $\text{cm}^{-1}$ ;  $^1\text{H}$  NMR (400 MHz,  $\text{DMSO}-d_6$ )  $\delta$  9.67 (s, 1H), 9.65 (s, 1H), 7.38 (s, 2H), 7.34 (s, 2H), 7.20 (t,  $^3J = 8.0$  Hz, 1H), 7.10 (m, 2H), 6.92 (d,  $^3J = 7.4$  Hz, 2H), 6.89 (s, 2H), 6.75 (s, 1H), 2.25 (s, 3H), 2.20 (s, 6H);  $^{13}\text{C}$  NMR (100 MHz,  $\text{DMSO}-d_6$ )  $\delta$  156.6, 156.3, 137.7, 137.6, 137.5, 137.4, 128.2, 125.5, 124.5, 121.9, 119.2, 118.5, 20.7, 20.6; HRMS (ESI) calcd for  $\text{C}_{17}\text{H}_{22}\text{N}_5$  *m/e* 296.1870, found 296.1875. Anal. Calcd for  $\text{C}_{17}\text{H}_{22}\text{ClN}_5$ : C, 61.53; H, 6.68; N, 21.10. Found: C, 61.65; H, 6.94; N, 21.30.

Triazine **2c** was prepared from 1-mexyl-5-(3-methylphenyl)biguanide hydrochloride using the same method used to make triazine **2b**. Yield: 68%;  $T_g$  38 °C; IR (KBr) 3266, 3181, 3104, 3013, 2950, 2918, 2851, 1749, 1702, 1583, 1525, 1489, 1428, 1345, 1300, 1256, 1220, 1164, 1104, 1044, 1000, 976, 893, 842, 827, 787, 728, 685, 648, 620, 540  $\text{cm}^{-1}$ ;  $^1\text{H}$  NMR (400 MHz,  $\text{CDCl}_3$ )  $\delta$  7.62 (bs, 1H), 7.57 (bs, 1H), 7.52 (d,  $^3J = 8.0$  Hz, 1H), 7.24 (t,  $^3J = 8.0$  Hz, 1H), 7.17 (m, 3H), 6.96 (d,  $^3J = 8.0$  Hz, 1H), 6.79 (s, 1H), 3.97 (s, 3H), 2.32 (s, 3H), 2.29 (s, 6H);  $^{13}\text{C}$  NMR (125 MHz,  $\text{CDCl}_3$ , 283 K)  $\delta$  164.6, 164.5, 163.7, 163.3, 138.8, 138.6, 137.5, 137.3, 128.8, 126.2, 125.3, 121.9, 118.9, 118.7, 53.5, 21.5, 21.4; HRMS (ESI) calcd for  $\text{C}_{20}\text{H}_{22}\text{N}_5\text{O}_2$   $m/e$  364.1768, found 364.1779. Anal. Calcd for  $\text{C}_{20}\text{H}_{21}\text{N}_5\text{O}_2$ : C, 66.10; H, 5.82; N, 19.27. Found, C, 65.86; H, 5.94; N, 19.00.

## Scheme 2

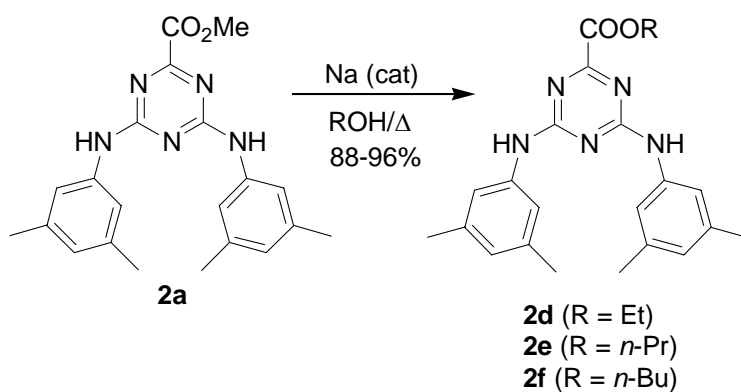

## Ethyl 4,6-bis(mexylamino)-1,3,5-triazine-2-carboxylate (**2d**)

Ethanollic NaOEt was prepared by dissolving a small piece of sodium in EtOH (30 mL) in a round-bottom flask at room temperature. Compound **2a** (0.500 g, 1.32 mmol) was added, and the mixture was heated at reflux overnight. Volatiles were removed by evaporation under reduced pressure, and  $\text{H}_2\text{O}$  and AcOEt were then added. The two phases were separated, and the organic phase was separated, dried over  $\text{MgSO}_4$ , and filtered. Solvent was removed by evaporation under reduced pressure, and the residue was thoroughly dried *in vacuo* for at least 2 days. The resulting glassy solid was ethyl 4,6-bis(mexylamino)-1,3,5-triazine-2-carboxylate (**2d**; 0.477 g, 1.22 mmol, 92%) of high enough purity to be used without further purification:  $T_g$  62 °C; IR (KBr) 3271, 3186, 3102, 2977, 2917, 2857, 1746, 1613, 1586, 1524, 1432, 1368, 1336, 1301, 1260, 1213, 1162, 1104, 1053, 1021, 992, 965, 887, 865, 841, 791, 757, 684, 645, 539  $\text{cm}^{-1}$ ;  $^1\text{H}$  NMR (400 MHz,  $\text{CDCl}_3$ )  $\delta$  7.47 (bs, 2H), 7.14 (s, 4H), 6.79 (s, 2H), 4.49 (q,  $^3J = 7.1$  Hz, 2H), 2.27 (s, 12H), 1.45 (t,  $^3J = 7.1$  Hz, 3H);  $^{13}\text{C}$  NMR (100 MHz,  $\text{CDCl}_3$ )  $\delta$  164.6, 163.7, 163.2, 138.5, 137.3, 126.1, 119.0, 62.7, 21.2, 14.0; HRMS (ESI) calcd for  $\text{C}_{22}\text{H}_{26}\text{N}_5\text{O}_2$   $m/e$  392.2081, found 392.2084. Anal. Calcd for  $\text{C}_{22}\text{H}_{25}\text{N}_5\text{O}_2$ : C, 67.50; H, 6.44; N, 17.89. Found, C, 67.26; H, 6.58; N, 18.12.

Esters **2e** and **2f** were synthesized by the same method of transesterification using the corresponding alcohols as solvents.

**Propyl 4,6-bis(mexylamino)-1,3,5-triazine-2-carboxylate (2e)**

Yield: 96%;  $T_g$  58 °C; IR (KBr) 3269, 3186, 3107, 3005, 2966, 2918, 1746, 1613, 1587, 1558, 1524, 1432, 1385, 1335, 1260, 1211, 1169, 1104, 1055, 996, 920, 886, 841, 791, 755, 684, 645, 539  $\text{cm}^{-1}$ ;  $^1\text{H}$  NMR (400 MHz,  $\text{CDCl}_3$ )  $\delta$  7.47 (bs, 2H), 7.14 (s, 4H), 6.78 (s, 2H), 4.37 (q,  $^3J = 6.9$  Hz, 2H), 2.27 (s, 12H), 1.84 (sext,  $^3J = 6.9$  Hz, 2H), 1.02 (m, 3H);  $^{13}\text{C}$  NMR (125 MHz,  $\text{CDCl}_3$ , 283 K)  $\delta$  164.7, 163.8, 163.5, 138.5, 137.5, 126.2, 119.3, 68.3, 21.8, 21.5, 10.2; HRMS (ESI) calcd for  $\text{C}_{23}\text{H}_{28}\text{N}_5\text{O}_2$   $m/e$  406.2238, found 406.2241. Anal. Calcd for  $\text{C}_{23}\text{H}_{27}\text{N}_5\text{O}_2$ : C, 68.13; H, 6.71; N, 17.27. Found: C, 68.30; H, 6.91; N, 17.48.

**Butyl 4,6-bis(mexylamino)-1,3,5-triazine-2-carboxylate (2f)**

Yield: 88%;  $T_g$  54 °C; IR (KBr) 3252, 3097, 3012, 2959, 2916, 2871, 1753, 1737, 1592, 1574, 1528, 1454, 1433, 1383, 1341, 1301, 1262, 1211, 1163, 1104, 1055, 995, 969, 917, 896, 861, 839, 794, 764, 726, 676, 654, 642, 544  $\text{cm}^{-1}$ ;  $^1\text{H}$  NMR (400 MHz,  $\text{CDCl}_3$ )  $\delta$  7.40 (bs, 2H), 7.14 (s, 4H), 6.78 (s, 2H), 4.43 (q,  $^3J = 7$  Hz, 2H), 2.27 (s, 12H), 1.81 (quint,  $^3J = 7$  Hz, 2H), 1.47 (m, 2H), 0.98 (t,  $^3J = 7$  Hz, 3H);  $^{13}\text{C}$  NMR (125 MHz,  $\text{CDCl}_3$ , 283 K)  $\delta$  164.7, 163.7, 163.6, 138.7, 137.4, 126.3, 119.1, 66.8, 30.5, 21.5, 19.1, 13.9; HRMS (ESI) calcd for  $\text{C}_{24}\text{H}_{30}\text{N}_5\text{O}_2$   $m/e$  420.2394, found 420.2388. Anal. Calcd for  $\text{C}_{24}\text{H}_{29}\text{N}_5\text{O}_2$ : C, 68.71; H, 6.97; N, 16.69. Found: C, 68.59; H, 7.08; N, 16.72.

Scheme 3

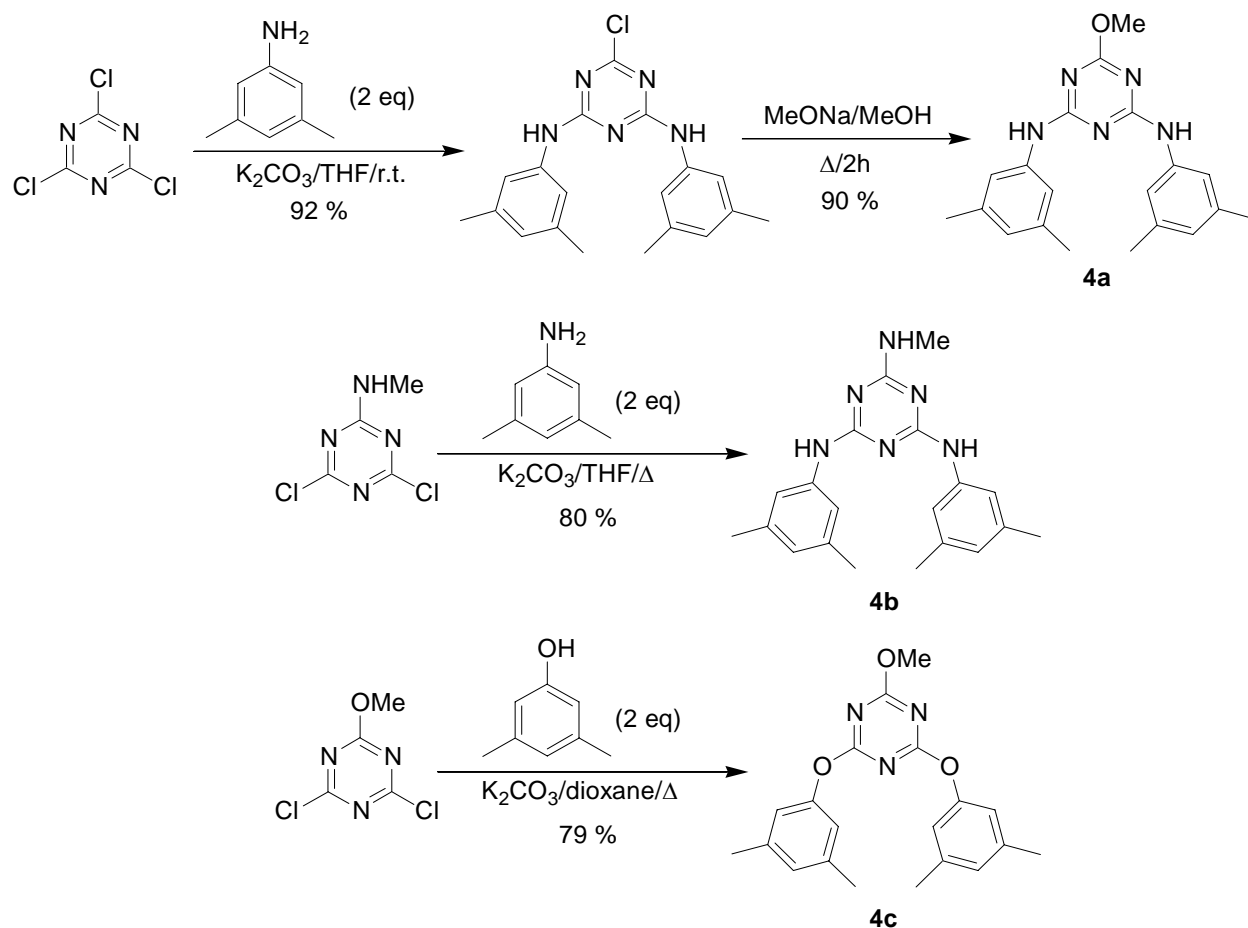

### 2-Methoxy-4,6-bis(mexylamino)-1,3,5-triazine (4a)

To a solution of cyanuric chloride (5.00 g, 27.1 mmol) in acetone (100 mL) in a round-bottom flask at 0 °C, 3,5-dimethylaniline (6.77 mL, 6.58 g, 54.3 mmol) was slowly added.  $K_2CO_3$  (3.75 g, 27.1 mmol) was then added, and the mixture was stirred for 2 h at room temperature.  $H_2O$  was added, and the resulting precipitate was separated by filtration and washed thoroughly with  $H_2O$  and hexane to yield 2-chloro-4,6-bis(mexylamino)-1,3,5-triazine (8.80 g, 24.9 mmol, 92%), which proved to be pure enough to be used without further purification: mp 186 °C; IR (KBr) 3259, 3185, 3139, 3096, 3015, 2955, 2916, 2853, 2474, 2343, 1710, 1622, 1604, 1592, 1577, 1525, 1441, 1386, 1305, 1275, 1248, 1230, 1167, 1047, 988, 957, 943, 885, 866, 842, 802, 755, 728, 681, 656, 641, 565, 543  $cm^{-1}$ ;  $^1H$  NMR (400 MHz,  $CDCl_3$ )  $\delta$  7.63 (bs, 2H), 7.12 (s, 4H), 6.79 (s, 2H), 2.27 (s, 12H);  $^{13}C$  NMR (100 MHz,  $CDCl_3$ )  $\delta$  168.7 (br), 164.2, 138.6, 136.9, 126.4, 119.2, 21.3; HRMS (ESI) calcd for  $C_{19}H_{21}ClN_5$   $m/e$  354.1480, found 354.1487. Anal. Calcd for  $C_{19}H_{20}ClN_5$ : C, 64.49; H, 5.70; N, 19.79. Found: C, 64.82; H, 5.72; N, 20.07.

A methanolic solution of sodium methoxide (25 wt%, 0.30 mL, 1.3 mmol) was diluted with methanol (10 mL) in a round-bottom flask. 2-Chloro-4,6-bis(mexylamino)-1,3,5-triazine (0.354 g, 1.00 mmol) was added, and the mixture was heated at reflux for 2 h. Volatiles were removed by

evaporation *in vacuo*, and then H<sub>2</sub>O and AcOEt were added. The two phases were separated, and the organic phase was dried over MgSO<sub>4</sub> and filtered. Removal of solvent by evaporation under reduced pressure left a residue of pure 2-methoxy-4,6-bis(mexylamino)-1,3,5-triazine (**4a**; 0.316 g, 0.904 mmol, 90%): *T<sub>g</sub>* 54 °C; IR (KBr) 3377, 3273, 3132, 3010, 2950, 2917, 2851, 1615, 1591, 1564, 1517, 1456, 1384, 1347, 1184, 1118, 1100, 1035, 993, 928, 884, 840, 811, 685, 644, 609, 539 cm<sup>-1</sup>; <sup>1</sup>H NMR (400 MHz, benzene-*d*<sub>6</sub>) δ 8.67 (bs, 2H), 7.34 (bs, 4H), 6.68 (s, 2H), 3.82 (s, 3H), 2.25 (s, 12H); <sup>13</sup>C NMR (100 MHz, benzene-*d*<sub>6</sub>) δ 170.4, 166.2, 139.1, 138.1, 125.4, 119.6, 53.8, 21.5; HRMS (ESI) calcd for C<sub>20</sub>H<sub>24</sub>N<sub>5</sub>O *m/e* 350.1975, found 350.1976. Anal. Calcd for C<sub>20</sub>H<sub>23</sub>N<sub>5</sub>O: C, 68.74; H, 6.63; N, 20.04. Found: C, 68.58; H, 6.75; N, 20.02.

## 2-Methylamino-4,6-bis(mexylamino)-1,3,5-triazine (**4b**)

To a stirred solution of 4,6-dichloro-2-methylamino-1,3,5-triazine<sup>3</sup> (0.456 g, 2.55 mmol) in THF (30 mL) in a round-bottom flask were added successively 3,5-dimethylaniline (0.637 mL, 0.619 g, 5.11 mmol) and K<sub>2</sub>CO<sub>3</sub> (0.352 g, 2.55 mmol), and the resulting mixture was heated at reflux overnight. The mixture was allowed to cool to room temperature, AcOEt and H<sub>2</sub>O were added, and the two phases were separated. The organic phase was extracted with aqueous K<sub>2</sub>CO<sub>3</sub> and then with brine. The organic phase was subsequently dried over MgSO<sub>4</sub>, and volatiles were removed by evaporation under reduced pressure. The residue was triturated with AcOEt/hexane to remove any unreacted 3,5-dimethylaniline, yielding pure 2-methylamino-4,6-bis(mexylamino)-1,3,5-triazine (**4b**; 0.713 g, 2.05 mmol, 80%): *T<sub>g</sub>* 94 °C; IR (KBr) 3401, 3274, 3148, 3013, 2945, 2916, 1587, 1555, 1515, 1426, 1355, 1318, 1180, 1092, 1034, 908, 882, 838, 808, 732, 686, 640, 538 cm<sup>-1</sup>; <sup>1</sup>H NMR (400 MHz, CDCl<sub>3</sub>) δ 7.18 (bs, 4H), 7.01 (s, 2H), 6.69 (s, 2H), 5.19 (bs, 1H), 2.98 (d, <sup>3</sup>*J* = 5.0 Hz, 3H), 2.28 (s, 12H); <sup>13</sup>C NMR (100 MHz, CDCl<sub>3</sub>) δ 166.5, 164.3, 164.1, 138.8, 138.6, 138.2, 124.8, 124.5, 118.5, 118.1, 27.4, 21.3; HRMS (ESI) calcd for C<sub>20</sub>H<sub>25</sub>N<sub>6</sub> *m/e* 349.2135, found 349.2137. Anal. Calcd for C<sub>20</sub>H<sub>24</sub>N<sub>6</sub>: C, 68.94; H, 6.94; N, 24.12. Found, C, 68.62; H, 7.25; N, 24.25.

## 2-Methoxy-4,6-bis(mexyloxy)-1,3,5-triazine (**4c**)

To a solution of 4,6-dichloro-2-methoxy-1,3,5-triazine (0.500 g, 2.78 mmol) in dioxane (10 mL) were added 3,5-dimethylphenol (0.679 g, 5.56 mmol) and K<sub>2</sub>CO<sub>3</sub> (0.768 g, 5.56 mmol), and the mixture was heated at reflux for 48 h. Volatiles were removed by evaporation under reduced pressure, and then H<sub>2</sub>O and AcOEt were added. The two phases were separated, and the organic phase was dried over MgSO<sub>4</sub> and filtered. Evaporation of solvent under reduced pressure left a residue that was triturated with hot hexane to give pure 2-methoxy-4,6-bis(mexyloxy)-1,3,5-triazine (**4c**; 0.771 g, 2.19 mmol, 79%): mp 125 °C; IR (KBr) 3017, 2955, 2919, 2863, 1620, 1598, 1567, 1503, 1470, 1452, 1431, 1360, 1285, 1199, 1153, 1114, 1091, 1036, 998, 949, 929, 901, 893, 868, 848, 813, 703, 683, 656, 634, 616, 543, 522, 508 cm<sup>-1</sup>; <sup>1</sup>H NMR (400 MHz, benzene-*d*<sub>6</sub>) δ 6.73 (s, 4H), 6.58 (s, 2H), 3.55 (s, 3H), 2.00 (s, 12H); <sup>13</sup>C NMR (100 MHz, benzene-*d*<sub>6</sub>) δ 174.7, 174.3, 152.5, 139.2, 127.6, 119.6, 55.1, 21.1; HRMS (ESI) calcd for C<sub>20</sub>H<sub>22</sub>N<sub>3</sub>O<sub>3</sub> *m/e* 352.1656, found 352.1651. Anal. Calcd for C<sub>20</sub>H<sub>21</sub>N<sub>3</sub>O<sub>3</sub>: C, 68.36; H, 6.02; N, 11.96. Found: C, 68.47; H, 5.83; N, 11.99.

**Measurement of *T<sub>g</sub>* by Modulated Differential Scanning Calorimetry (mDSC).** Measurements were made with a TA Instruments Q1000 calorimeter, using a 60 sec period and heating/cooling

rates of 5 °C/min from 20 °C to 200 °C. Three cycles of heating and cooling were recorded. Essentially identical thermograms were obtained when slower heating/cooling rates were used.

**Crystal Structure of Methyl 4,6-Bis(dimethylamino)-1,3,5-triazine-2-carboxylate (2a).** Single crystals of compound **2a** suitable for X-ray diffraction were obtained by slow evaporation of a saturated solution in CHCl<sub>3</sub>. Data were collected using a Nonius Kappa CCD diffractometer at the University of Toronto. Compound **2a** crystallized in the monoclinic space group C2/c with cell lattice parameters  $a = 24.7394(1)$  Å,  $b = 13.3588(6)$  Å,  $c = 19.2393(5)$  Å, and  $\beta = 114.790(2)^\circ$ . One included molecule of CHCl<sub>3</sub> was located, whereas disordered molecules of included H<sub>2</sub>O were accounted for by using the Bypass/Squeeze method<sup>4</sup> implemented in Platon.<sup>5</sup> Platon found a remaining solvent void of 1109 Å<sup>3</sup> filled with 93 electron of diffuse scattering. Refinement on F<sup>2</sup> of 3656 observed reflections over a total of 6596 unique reflections led to residual factors  $R_1 = 0.0701$ ,  $wR_2 = 0.1973$ , and GoF = 1.035.

**FT-IR Spectra.** Infrared spectra were recorded using a Perkin-Elmer Spectrum One spectrometer. Pellets containing compound **2a** in KBr were prepared from the amorphous solid generated by heating and from single crystals grown from CHCl<sub>3</sub>. A solution of compound **2a** in CH<sub>2</sub>Cl<sub>2</sub> was also prepared, and its spectrum was recorded using cells with NaCl windows.

## References

- (1) Lebel, O.; Maris, T.; Duval, H.; Wuest, J. D. *Can. J. Chem.* **2005**, 83, 615.
- (2) Lebel, O.; Perron, M.-È.; Maris, T.; Zalzal, S. F.; Nanci, A.; Wuest, J. D. *Chem. Mater.*, in press.
- (3) Koopman, H.; Daams, J. *Recl. Trav. Chim. Pays-Bas* **1958**, 77, 235.
- (4) van der Sluis, P.; Spek, A. L. *Acta Crystallogr.* **1990**, A46, 194.
- (5) Spek, A. L. *Platon, A Multipurpose Crystallographic Tool*; Utrecht University: Utrecht, The Netherlands, 2001.



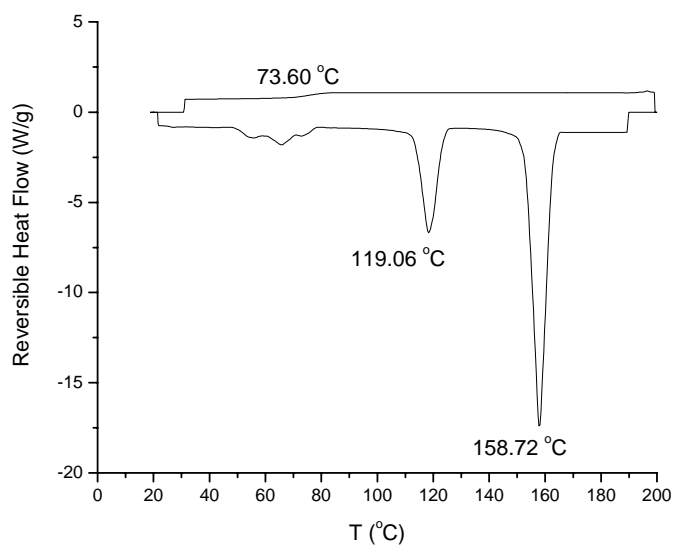**a**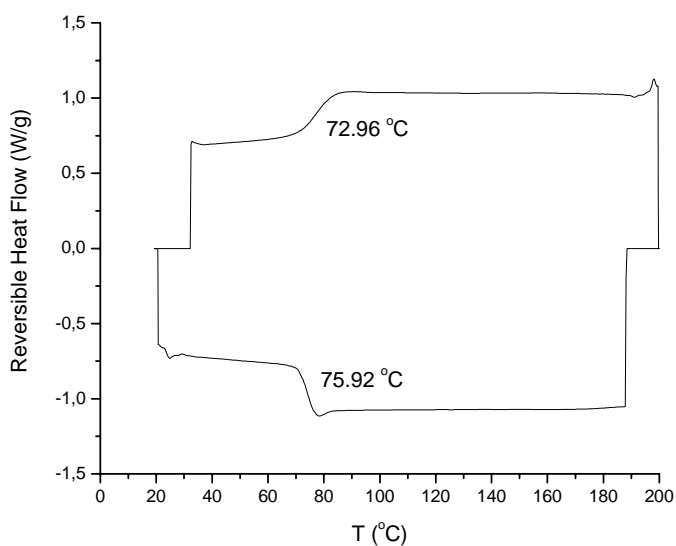**b**

**Figure S1.** Representative thermograms obtained by modulated differential scanning calorimetry (mDSC) of single crystals of compound **2a** crystallized from  $\text{CHCl}_3$ . a) First heating/cooling cycle. b) Second heating/cooling cycle. Glass transition temperatures and melting points are indicated in

each case. For the sake of simplicity, only the reversible heat flow signal is shown. In the initial heating cycle (Figure S1a), small exotherms near 60 °C are presumably due to loss of included  $\text{CHCl}_3$ , another (near 119 °C) appears to correspond to loss of included  $\text{H}_2\text{O}$ , and a third (near 159 °C) is also attributed to loss of guests. Further heating/cooling cycles show only the presence of a glassy phase, as shown in Figure S1b. The initial behavior of crystalline compound **2a** is abnormal because it is an inclusion compound of  $\text{CHCl}_3$  and  $\text{H}_2\text{O}$ , as shown by X-ray crystallography, and it therefore undergoes transitions related to loss of the guests.

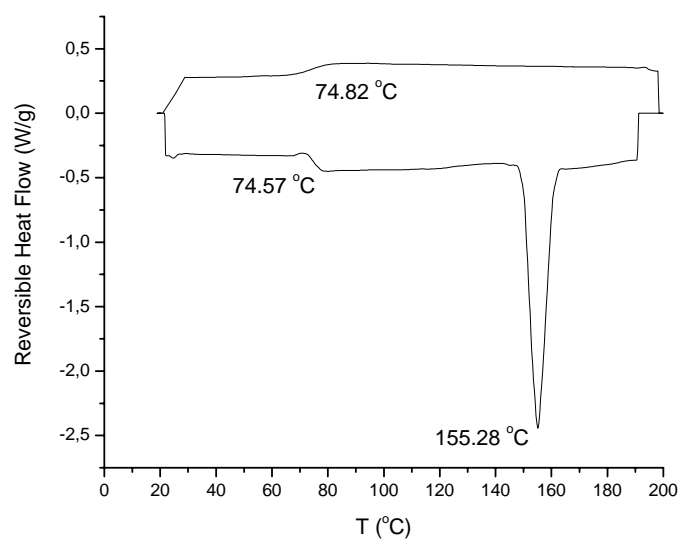**a**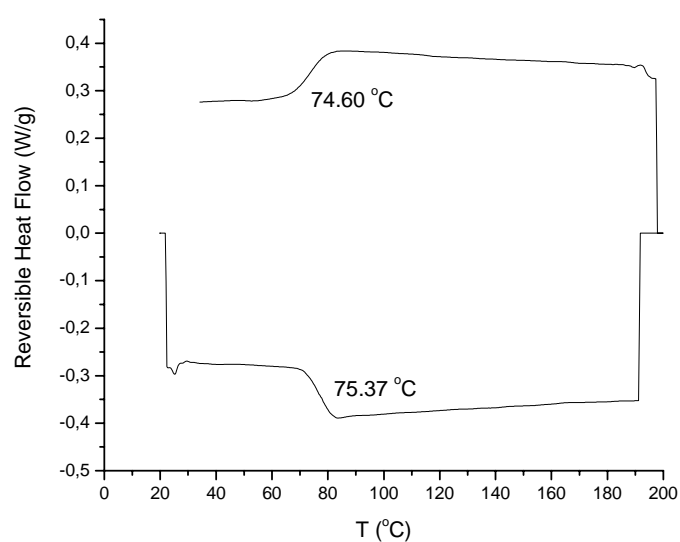**b**

**Figure S2.** Representative thermograms obtained by modulated differential scanning calorimetry (mDSC) of amorphous **2a**. a) First heating/cooling cycle. b) Second heating/cooling cycle. Glass transition temperatures and melting points are indicated in each case. For the sake of simplicity,

only the reversible heat flow signal is shown. The solid sample used in the initial heating cycle was shown to be amorphous by X-ray powder diffraction and polarized optical microscopy. The exotherm at 155 °C in Figure S2a appears only in the initial cycle of heating and is presumably related to the loss of trapped guests.

CRYSTAL AND MOLECULAR STRUCTURE OF  
C<sub>22</sub> H<sub>26</sub> Cl<sub>3</sub> N<sub>5</sub> O<sub>3</sub> COMPOUND (JW1027)

Equipe WUEST

Département de chimie, Université de Montréal,  
C.P. 6128, Succ. Centre-Ville, Montréal, Québec, H3C 3J7 (Canada)

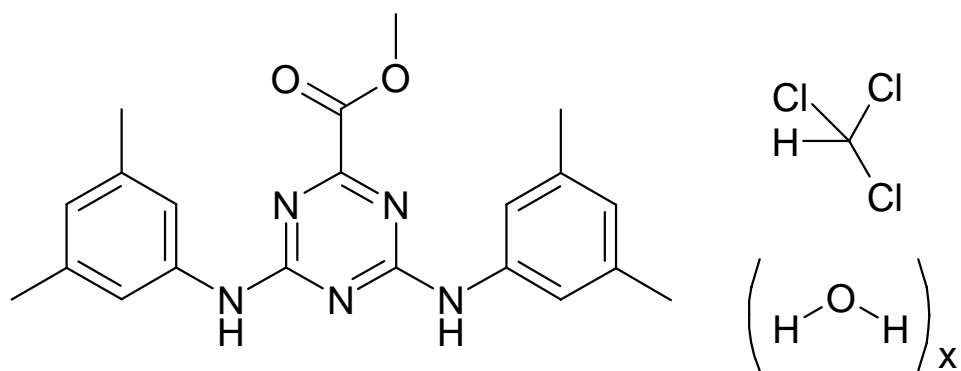

**Table S1.** Crystal data and structure refinement for C<sub>22</sub> H<sub>24</sub> Cl<sub>3</sub> N<sub>5</sub> O<sub>2</sub>.

|                                      |                                                                                                                                                           |
|--------------------------------------|-----------------------------------------------------------------------------------------------------------------------------------------------------------|
| Identification code                  | JW1027                                                                                                                                                    |
| Empirical formula                    | C <sub>22</sub> H <sub>24</sub> Cl <sub>3</sub> N <sub>5</sub> O <sub>2</sub>                                                                             |
| Formula weight                       | 496.81                                                                                                                                                    |
| Temperature                          | 225(2)K                                                                                                                                                   |
| Wavelength                           | 0.71073 Å                                                                                                                                                 |
| Crystal system                       | Monoclinic                                                                                                                                                |
| Space group                          | C2/c                                                                                                                                                      |
| Unit cell dimensions                 | $a = 24.7394(1) \text{ Å}$ $\alpha = 90^\circ$<br>$b = 13.3588(6) \text{ Å}$ $\beta = 114.790(2)^\circ$<br>$c = 19.2393(5) \text{ Å}$ $\gamma = 90^\circ$ |
| Volume                               | 5772.5(3) Å <sup>3</sup>                                                                                                                                  |
| Z                                    | 8                                                                                                                                                         |
| Density (calculated)                 | 1.143 g/cm <sup>3</sup>                                                                                                                                   |
| Absorption coefficient               | 0.342 mm <sup>-1</sup>                                                                                                                                    |
| F(000)                               | 2064                                                                                                                                                      |
| Crystal size                         | 0.50 x 0.40 x 0.25 mm                                                                                                                                     |
| Theta range for data collection      | 2.61 to 27.55°                                                                                                                                            |
| Index ranges                         | $-32 \leq h \leq 32, -17 \leq k \leq 17, -22 \leq \ell \leq 24$                                                                                           |
| Reflections collected                | 16419                                                                                                                                                     |
| Independent reflections              | 6596 [ $R_{\text{int}} = 0.062$ ]                                                                                                                         |
| Absorption correction                | Semi-empirical from equivalents                                                                                                                           |
| Max. and min. transmission           | 0.9930 and 0.7260                                                                                                                                         |
| Refinement method                    | Full-matrix least-squares on $F^2$                                                                                                                        |
| Data / restraints / parameters       | 6596 / 0 / 295                                                                                                                                            |
| Goodness-of-fit on $F^2$             | 1.035                                                                                                                                                     |
| Final R indices [ $I > 2\sigma(I)$ ] | $R_1 = 0.0701, wR_2 = 0.1973$                                                                                                                             |
| R indices (all data)                 | $R_1 = 0.1247, wR_2 = 0.2238$                                                                                                                             |

|                             |                                   |
|-----------------------------|-----------------------------------|
| Extinction coefficient      | 0.0019(5)                         |
| Largest diff. peak and hole | 0.444 and -0.454 e/Å <sup>3</sup> |

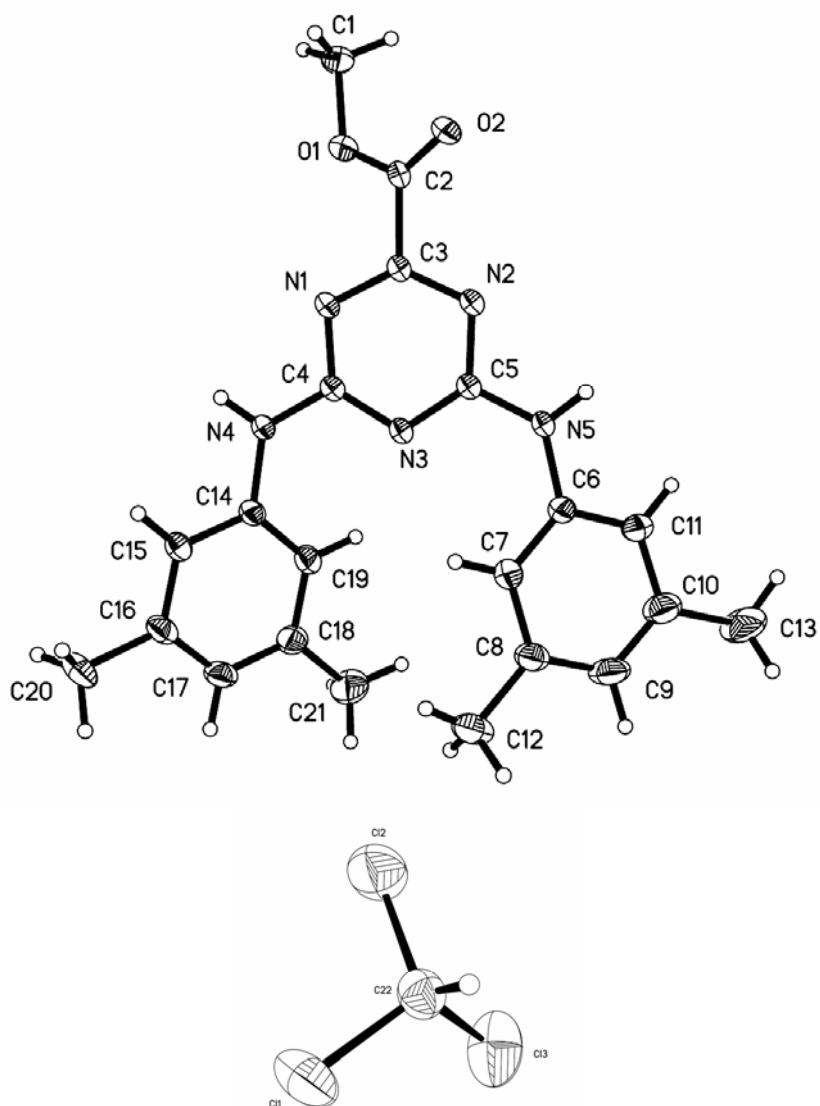

**Figure S3** ORTEP view of the C<sub>22</sub> H<sub>24</sub> Cl<sub>3</sub> N<sub>5</sub> O<sub>2</sub> compound with the numbering scheme adopted. Ellipsoids are drawn at 30% probability level. Hydrogen atoms are represented by sphere of arbitrary size.



## REFERENCES

- Blessing R. H. (1995). *Acta Crystallogr.* A51, 33-37.
- Flack, H. D. (1983). *Acta Crystallogr.* A39, 876-881.
- Flack, H. D. and Schwarzenbach, D. (1988). *Acta Crystallogr.* A44, 499-506.
- Nonius (1997). Kappa CCD Server Software, Windows 3.11 Version. Nonius BV, Delft, The Netherlands.
- Otwinowski, Z. and Minor, W. (1997). *Methods in Enzymology*, Vol. 76, *Macromolecular Crystallography, Part A*, edited by C. W. Carter, Jr. and R. M. Sweet, pp 307-326. New York: Academic Press.
- Sheldrick, G.M. (1996). SADABS, Bruker Area Detector Absorption Corrections. Bruker AXS Inc., Madison, WI 53719-1173.
- Sheldrick, G.M. (1997). SHELXS97, Program for the Solution of Crystal Structures. Univ. of Gottingen, Germany.
- Sheldrick, G.M. (1997). SHELXL97, Program for the Refinement of Crystal Structures. Univ. of Gottingen, Germany.
- SHELXTL (1997) Release 5.10; The Complete Software Package for Single Crystal Structure Determination. Bruker AXS Inc., Madison, WI 53719-1173.
- Spek, A. L. (2004). PLATON, A Multipurpose Crystallographic Tool. University of Utrecht, Utrecht, The Netherlands.
- XPREP (1997) Release 5.10; X-Ray Data Preparation and Reciprocal Space Exploration Program. Bruker AXS Inc., Madison, WI 53719-11.

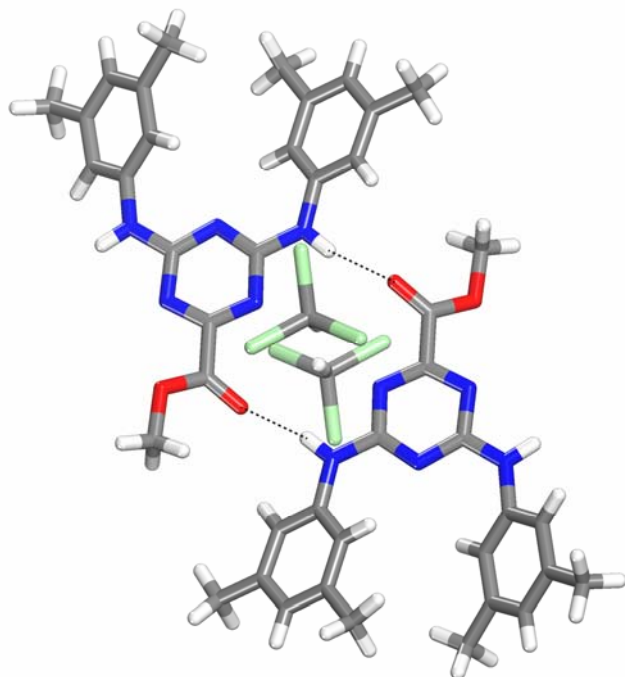

**Figure S4.** View of the crystal structure of methyl 4,6-bis(dimethylamino)-1,3,5-triazine-2-carboxylate (**2a**), showing two included molecules of  $\text{CHCl}_3$ . The hydrogen atoms of the  $\text{CHCl}_3$  molecules point into a small cavity between two hydrogen-bonded molecules of compound **2a**. No notable interactions are present between molecules of compound **2a** and  $\text{CHCl}_3$  (the shortest N-H distance between the triazine rings and the hydrogen atoms of  $\text{CHCl}_3$  is 2.937 Å). Hydrogen bonds are represented as dotted lines. Carbon atoms are shown in gray, hydrogen atoms in white, chlorine atoms in light green, nitrogen atoms in blue, and oxygen atoms in red.

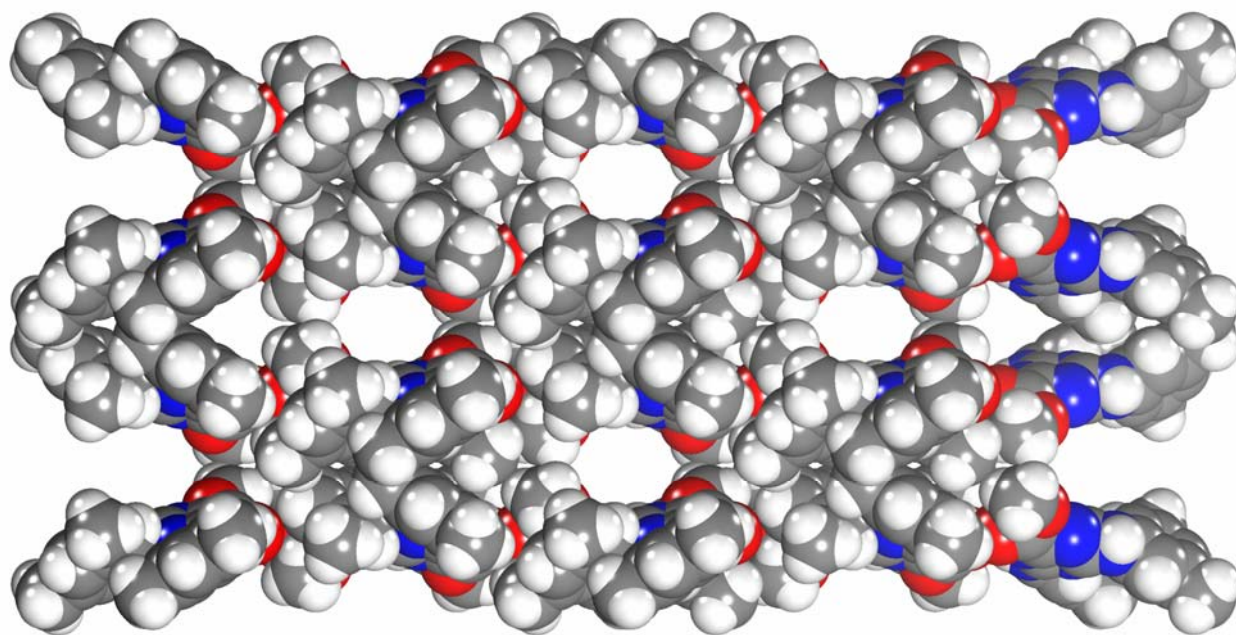

**Figure S5.** View along the  $c$  axis of a  $2 \times 4 \times 1$  array of unit cells in the crystal structure of compound **2a**. Guest molecules have been omitted for clarity, revealing the presence of small channels along the  $c$  axis occupied by disordered water molecules. Carbon atoms are shown in gray, hydrogen atoms in white, nitrogen atoms in blue, and oxygen atoms in red.

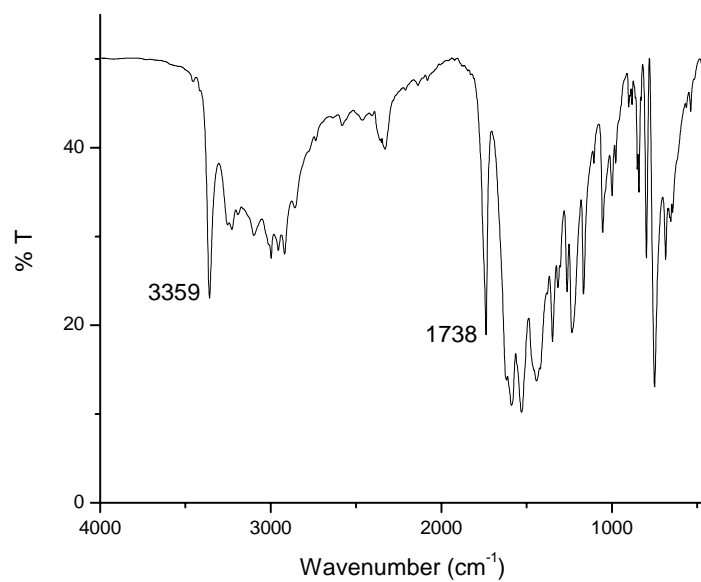**a**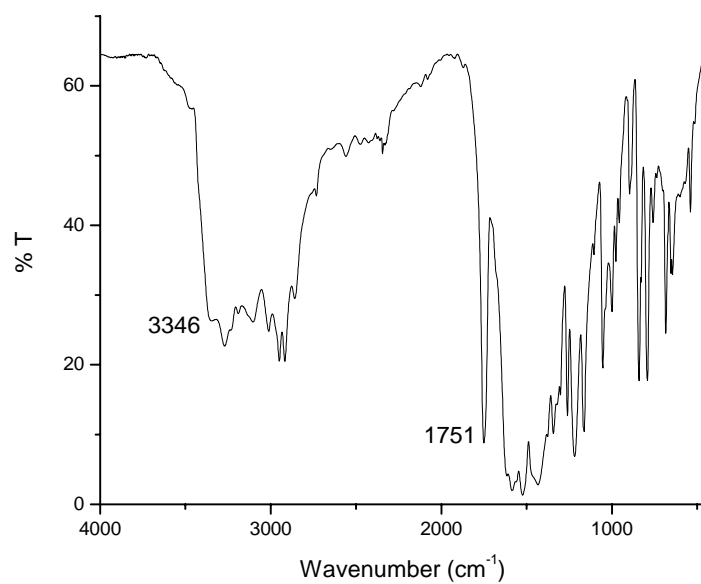**b**

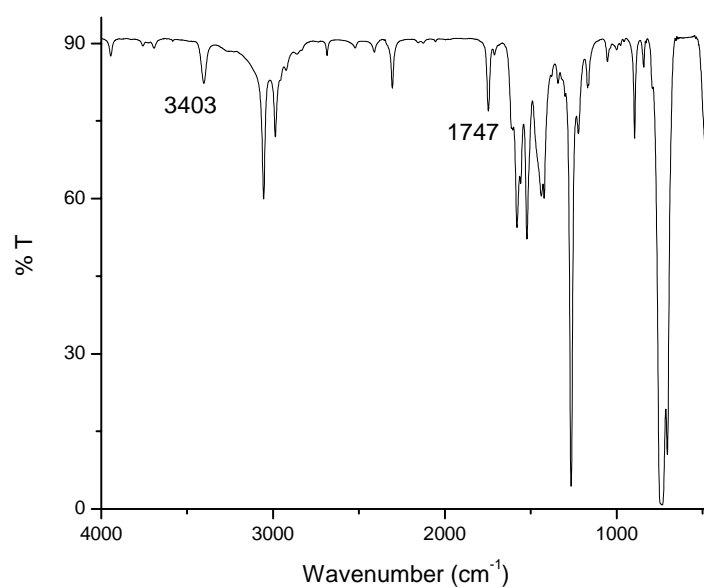**c**

**Figure S6.** FT-IR spectra of compound **2a** in a) the crystalline state, b) the amorphous state, and c) in solution in  $\text{CH}_2\text{Cl}_2$ . Wavenumbers are indicated for peaks corresponding to N-H and C=O stretching.
